# Supplementary material for: Identification of HIV-1 Envelope Mutations that Enhance Entry Using Macaque CD4 and CCR5
Source: MDPI journal article supplement (doi:10.3390/v12020241), 2020-02-21
Supplement: s1 [file s1]

**Figure S1**

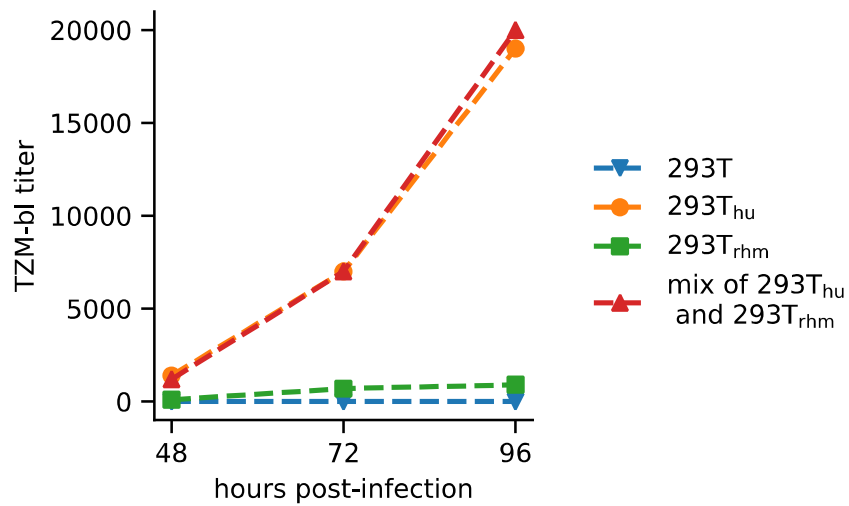

**Figure S1. Wild-type BF520 infection of 293T cells engineered to express either macaque or human CD4/CCR5 receptors.** TzM-bl titer of supernatant harvested from cells infected with viruses bearing the BF520 Env (MOI of 0.01). The cells that were infected are shown to the right. “Mix of 293T<sub>hu</sub> and 293T<sub>rhm</sub>” refers to a 3:1 mixture of these cells, respectively. Each data point reports the titer of one viral supernatant sample assayed in triplicate on TzM-bl cells.

**Figure S2**

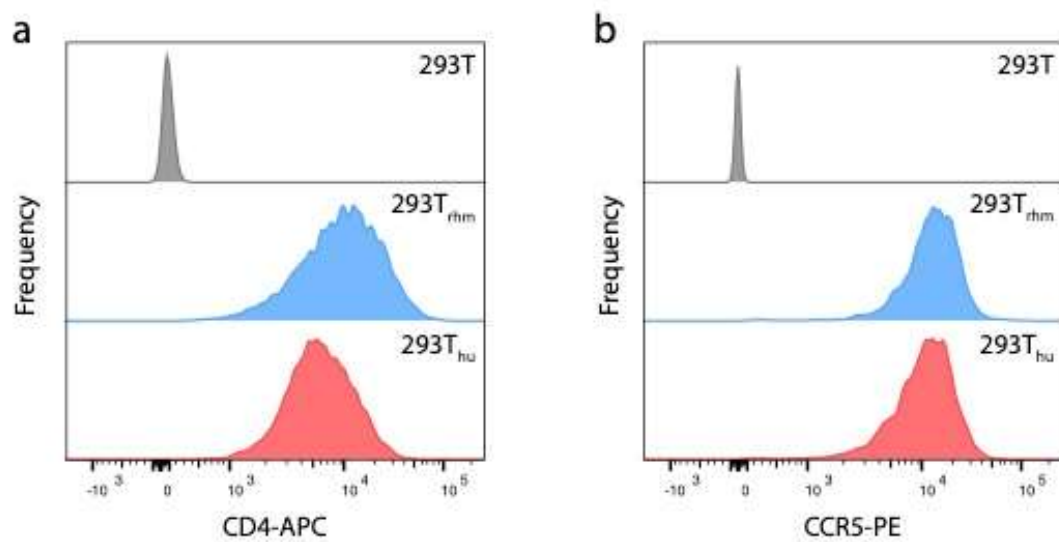

**Figure S2. Expression of CD4 and CCR5 on 293T<sub>rhm</sub> and 293T<sub>hu</sub> cells.** Expression of CD4 (a) and CCR5 (b) on un-transduced 293Ts, 293T<sub>rhm</sub>, and 293T<sub>hu</sub> cells. For each density plot, receptor expression on 10,000 cells taken from one biological sample was measured. Data is representative of multiple independent experiments.

**Supplementary Table 1****Fold-change following infection**

| <b>Mutation</b> | <b>Location</b> | <b>293T<sub>rh</sub>m</b> | <b>293T<sub>hu</sub></b> |
|-----------------|-----------------|---------------------------|--------------------------|
| N656Y           | CHR             | 34.2                      | 4.5                      |
| N656Q           | CHR             | 32.8                      | 4.7                      |
| N656I           | CHR             | 31.6                      | 8.8                      |
| N656G           | CHR             | 27.8                      | 1.2                      |
| Q653L           | CHR             | 26.8                      | 2.8                      |
| N656R           | CHR             | 24.2                      | 3.3                      |
| Q653I           | CHR             | 23.0                      | 5.0                      |
| K588M           | gp41            | 20.8                      | 1.8                      |
| Q653N           | CHR             | 20.6                      | 3.0                      |
| Q653M           | CHR             | 19.8                      | 2.3                      |
| N554D           | NHR             | 17.3                      | 4.4                      |
| N656E           | CHR             | 17.2                      | 3.4                      |
| Q652F           | CHR             | 15.6                      | 3.0                      |
| Q653E           | CHR             | 15.6                      | 1.8                      |
| N656H           | CHR             | 15.5                      | 3.7                      |
| S649F           | CHR             | 15.0                      | 6.1                      |
| K588F           | gp41            | 14.0                      | 1.9                      |
| K655F           | CHR             | 13.9                      | 2.0                      |
| Q653F           | CHR             | 13.5                      | 1.1                      |
| N656S           | CHR             | 11.4                      | 3.1                      |
| Q652D           | CHR             | 11.2                      | 2.2                      |
| Q653Y           | CHR             | 11.1                      | 1.0                      |
| N656D           | CHR             | 10.8                      | 6.3                      |
| K655W           | CHR             | 10.7                      | 1.6                      |
| N656M           | CHR             | 10.5                      | 5.2                      |
| K655Y           | CHR             | 10.1                      | 1.9                      |
| R273K           | gp120           | 4.0                       | 10.6                     |
| E482K           | gp120           | 7.9                       | 11.7                     |

**Table S1.** Fold-change relative to the wild-type residue for all mutants that were enriched greater than 10-fold following either 293T<sub>rh</sub>m or 293T<sub>hu</sub> infection in the DMS.
